# Supplementary material for: Early infant diagnosis of HIV infection: a mixed-method study of uptake and challenges at primary health centers in Lagos State, Nigeria
Source: Springer Nature journal article supplement (doi:10.1186/s12913-023-09824-7), 2023-09-28
Supplement: MOESM2 [file 26100526]

Appendix 2: Codes generated deductively and their meanings

| Coders  | Serial No. | Codes                          | Meaning                                                                                                                                                                              | Number of transcript quotes |
|---------|------------|--------------------------------|--------------------------------------------------------------------------------------------------------------------------------------------------------------------------------------|-----------------------------|
| Coder 1 | 1.         | DBS Sample Collection          | The process of collecting, sending and retrieval of result and any challenges associated with the process                                                                            | 32                          |
|         | 2.         | Non-disclosure of HIV status   | A situation where women refuse or show reluctance to disclose their status to their spouse. It also includes women forbidden health workers to disclose their status to their spouse | 13                          |
|         | 3.         | Denial of HIV result           | Refusal to accept HIV infection status                                                                                                                                               | 8                           |
|         | 4.         | Referral to secondary facility | When HIV positive mothers or their children are referred to another health facility to continue treatment for HIV in the context of early infant diagnosis                           | 23                          |
| Coder 2 | 5.         | Challenge_DBS                  | The challenges involved in the collection of dry blood sample as well as the process and system that support it                                                                      | 1                           |
|         | 6.         | Referral                       | Linking women up with another health facility to access care because of lack of expertise/equipment or because the facility is not empowered to offer such services                  | 3                           |
|         | 7.         | Care for infant_DBS            | All types of care rendered to infant children in the process of collecting their dry blood sample                                                                                    | 15                          |
|         | 8.         | Postnatal appointment          | All appointments given to women with positive HIV status shortly after delivery, including appointment for vaccination and DBS                                                       | 10                          |
